# Supplementary material for: HDL-apoA-II Is Strongly Associated with 1-Year Mortality in Acute Heart Failure Patients
Source: MDPI journal article supplement (doi:10.3390/biomedicines10071668), 2022-07-11
Supplement: s1 [file s1]

**Table S5.** Impact of chronic medication on Cox regression analyses of HDL parameters as predictors of 1-year mortality in AHF patients

|                          |                      | HDL-apoA-II<br>(mg/dL) | HDL2-apoA-II<br>(mg/dL) | HDL3-apoA-II<br>(mg/dL) |
|--------------------------|----------------------|------------------------|-------------------------|-------------------------|
| Univariable              | HR (95% CI) per 1 SD | 0.50 (0.41-0.62)       | 0.73 (0.60-0.89)        | 0.51 (0.40-0.63)        |
|                          | p-value              | <b>&lt;0.001</b>       | <b>0.002</b>            | <b>&lt;0.001</b>        |
|                          | events/N             | 117/314                | 117/314                 | 117/314                 |
| Base                     | HR (95% CI) per 1 SD | 0.67 (0.47-0.94)       | 0.72 (0.54-0.95)        | 0.59 (0.43-0.80)        |
|                          | p-value              | <b>0.020</b>           | <b>0.019</b>            | <b>&lt;0.001</b>        |
|                          | events/N             | 111/302                | 111/302                 | 111/302                 |
| Base +<br>furosemide     | HR (95% CI) per 1 SD | 0.67 (0.47-0.94)       | 0.72 (0.54-0.95)        | 0.59 (0.43-0.80)        |
|                          | p-value              | <b>0.020</b>           | <b>0.019</b>            | <b>&lt;0.001</b>        |
|                          | events/N             | 111/302                | 111/302                 | 111/302                 |
| Base + MRA               | HR (95% CI) per 1 SD | 0.68 (0.48-0.95)       | 0.73 (0.55-0.96)        | 0.60 (0.44-0.82)        |
|                          | p-value              | <b>0.025</b>           | <b>0.027</b>            | <b>0.001</b>            |
|                          | events/N             | 111/302                | 111/302                 | 111/302                 |
| Base + beta-<br>blockers | HR (95% CI) per 1 SD | 0.70 (0.50-1.00)       | 0.71 (0.53-0.94)        | 0.62 (0.46-0.85)        |
|                          | p-value              | <b>0.048</b>           | <b>0.017</b>            | <b>0.003</b>            |
|                          | events/N             | 111/302                | 111/302                 | 111/302                 |
| Base + ACEI              | HR (95% CI) per 1 SD | 0.66 (0.47-0.93)       | 0.72 (0.54-0.95)        | 0.59 (0.43-0.80)        |
|                          | p-value              | <b>0.018</b>           | <b>0.020</b>            | <b>&lt;0.001</b>        |
|                          | events/N             | 111/302                | 111/302                 | 111/302                 |
| Base + statins           | HR (95% CI) per 1 SD | 0.67 (0.47-0.95)       | 0.72 (0.54-0.95)        | 0.59 (0.43-0.81)        |
|                          | p-value              | <b>0.026</b>           | <b>0.021</b>            | <b>&lt;0.001</b>        |
|                          | events/N             | 111/302                | 111/302                 | 111/302                 |
| Base +<br>metformin      | HR (95% CI) per 1 SD | 0.69 (0.49-0.97)       | 0.73 (0.55-0.97)        | 0.59 (0.45-0.90)        |
|                          | p-value              | <b>0.034</b>           | <b>0.028</b>            | <b>&lt;0.001</b>        |
|                          | events/N             | 111/302                | 111/302                 | 111/302                 |
| Base + ASA               | HR (95% CI) per 1 SD | 0.63 (0.45-0.90)       | 0.71 (0.54-0.94)        | 0.57 (0.42-0.78)        |
|                          | p-value              | <b>0.010</b>           | <b>0.016</b>            | <b>&lt;0.001</b>        |
|                          | events/N             | 111/302                | 111/302                 | 111/302                 |

Significant p-values (<0.05) are depicted in bold.

Base: Adjusted for age, sex, BMI, MAP, eGFR, BUN, CRP, NT-proBNP, hemoglobin, ALT, albumin, and total cholesterol.

ACEI, angiotensinogen converting enzyme inhibitor; AHF, acute heart failure; Ang II, angiotensin II; ASA, acetylsalicylic acid; HDL, high-density lipoprotein; HDL-C, high-density lipoprotein cholesterol; HR, hazard ratio; MRA, mineralocorticoid receptor antagonist; SD, standard deviation.
