# Supplementary material for: HDL-apoA-II Is Strongly Associated with 1-Year Mortality in Acute Heart Failure Patients
Source: MDPI journal article supplement (doi:10.3390/biomedicines10071668), 2022-07-11
Supplement: s1 [file s1]

**Table S7.** Correlation analyses of HDL parameters with laboratory and clinical parameters

|                                      |   | HDL-apoA-I<br>(mg/dL) | HDL-p<br>( $\mu$ mol/L) | SHDL-p<br>( $\mu$ mol/L) |
|--------------------------------------|---|-----------------------|-------------------------|--------------------------|
| Protein (g/L)                        | r | 0.03                  | 0.13                    | 0.17                     |
|                                      | p | 0.635                 | 0.021                   | <b>0.005</b>             |
|                                      | n | 303                   | 303                     | 281                      |
| Albumin (g/L)                        | r | 0.32                  | 0.45                    | 0.37                     |
|                                      | p | <b>&lt;0.001</b>      | <b>&lt;0.001</b>        | <b>&lt;0.001</b>         |
|                                      | n | 303                   | 303                     | 280                      |
| ALT (U/L)                            | r | -0.02                 | 0.05                    | 0.13                     |
|                                      | p | 0.733                 | 0.358                   | 0.031                    |
|                                      | n | 314                   | 314                     | 290                      |
| AST (U/L)                            | r | -0.05                 | -0.05                   | 0.02                     |
|                                      | p | 0.332                 | 0.338                   | 0.755                    |
|                                      | n | 314                   | 314                     | 290                      |
| BUN (mmol/L)                         | r | -0.24                 | -0.37                   | -0.34                    |
|                                      | p | <b>&lt;0.001</b>      | <b>&lt;0.001</b>        | <b>&lt;0.001</b>         |
|                                      | n | 313                   | 313                     | 290                      |
| eGFR<br>(ml/min/1.73m <sup>2</sup> ) | r | 0.17                  | 0.25                    | 0.22                     |
|                                      | p | <b>0.002</b>          | <b>&lt;0.001</b>        | <b>&lt;0.001</b>         |
|                                      | n | 314                   | 314                     | 290                      |
| CK (U/L)                             | r | 0.07                  | 0.13                    | 0.15                     |
|                                      | p | 0.213                 | 0.023                   | <b>0.010</b>             |
|                                      | n | 314                   | 314                     | 290                      |
| hsTnI (U/L)                          | r | 0.02                  | 0.09                    | 0.15                     |
|                                      | p | 0.704                 | 0.106                   | <b>0.014</b>             |
|                                      | n | 311                   | 311                     | 287                      |
| NT-proBNP (pg/mL)                    | r | -0.16                 | -0.26                   | -0.26                    |
|                                      | p | <b>0.005</b>          | <b>&lt;0.001</b>        | <b>&lt;0.001</b>         |
|                                      | n | 314                   | 314                     | 290                      |
| CRP (mg/L)                           | r | -0.33                 | -0.32                   | -0.21                    |
|                                      | p | <b>&lt;0.001</b>      | <b>&lt;0.001</b>        | <b>&lt;0.001</b>         |
|                                      | n | 314                   | 314                     | 290                      |
| IL-6 (pg/mL)                         | r | -0.17                 | -0.22                   | -0.15                    |
|                                      | p | <b>0.002</b>          | <b>&lt;0.001</b>        | <b>0.009</b>             |
|                                      | n | 314                   | 314                     | 290                      |
| Hemoglobin (g/L)                     | r | 0.18                  | 0.31                    | 0.33                     |
|                                      | p | <b>0.001</b>          | <b>&lt;0.001</b>        | <b>&lt;0.001</b>         |
|                                      | n | 314                   | 314                     | 290                      |
| MAP (mm Hg)                          | r | 0.29                  | 0.35                    | 0.29                     |
|                                      | p | <b>&lt;0.001</b>      | <b>&lt;0.001</b>        | <b>&lt;0.001</b>         |
|                                      | n | 314                   | 314                     | 290                      |
| SPAP (mm Hg)                         | r | -0.20                 | -0.28                   | -0.29                    |
|                                      | p | <b>0.001</b>          | <b>&lt;0.001</b>        | <b>&lt;0.001</b>         |
|                                      | n | 259                   | 258                     | 237                      |

Data presented are the Spearman correlation coefficient *r*, the corresponding *p*-values, and the number of available samples (*n*).

P-values of  $< 0.017$  are considered significant after a Bonferroni correction for multiple testing and are depicted in bold.

apoA-I, apolipoprotein A-I; ALT, alanine aminotransferase; AST, aspartate aminotransferase; BUN, blood urea nitrogen; CK, creatin kinase; CRP, C-reactive protein; eGFR, estimated glomerular filtration rate; HDL-p, HDL particle concentrations; hsTnI, high-sensitivity troponin I; IL-6, interleukin-6; MAP, mean arterial pressure; NT-proBNP, N-terminal pro brain natriuretic peptide; S, small; SPAP, systolic pulmonary pressure.
