# Supplementary material for: HDL-apoA-II Is Strongly Associated with 1-Year Mortality in Acute Heart Failure Patients
Source: MDPI journal article supplement (doi:10.3390/biomedicines10071668), 2022-07-11
Supplement: s1 [file s1]

**Table S8.** Serum levels of HDL parameters in various groups of AHF patients

|                         |                                    | HDL-apoA-I<br>(mg/dL) | HDL-p<br>( $\mu$ mol/L) | SHDL-p<br>( $\mu$ mol/L) |
|-------------------------|------------------------------------|-----------------------|-------------------------|--------------------------|
| CAD                     | no<br>(n=158)                      | 124.5 (48.0-240.4)    | 21.9 (4.5-42.7)         | 15.0 (6.1-37.9)          |
|                         | yes (n=156)                        | 122.1 (52.4-210.0)    | 23.9 (5.9-56.3)         | 19.3 (6.1-40.4)          |
|                         |                                    | <b>p=0.987</b>        | <b>p=0.034</b>          | <b>p&lt;0.001</b>        |
| MetS                    | no<br>(n=98)                       | 132.3 (73.0-240.4)    | 25.2 (5.2-56.3)         | 17.6 (6.1-40.4)          |
|                         | yes<br>(n=216)                     | 118.1 (48.0-193.1)    | 21.7 (4.5-42.7)         | 16.2 (6.1-37.9)          |
|                         |                                    | <b>p&lt;0.001</b>     | <b>p=0.002</b>          | <b>p=0.364</b>           |
| AF                      | no<br>(n=144)                      | 128.8 (48.0-216.5)    | 25.5 (4.5-56.3)         | 19.8 (6.5-40.4)          |
|                         | yes (n=170)                        | 119.9 (60.4-240.4)    | 20.9 (5.2-41.6)         | 14.2 (6.1-36.4)          |
|                         |                                    | <b>p=0.001</b>        | <b>p&lt;0.001</b>       | <b>p&lt;0.001</b>        |
| Venous<br>overload<br>* | no<br>(n=66)                       | 133.6 (90.6-213.1)    | 29.0 (16.3-42.7)        | 21.4 (11.4-37.3)         |
|                         | yes (n=248)                        | 119.7 (48.0-240.4)    | 21.5 (4.5-56.3)         | 15.0 (6.1-40.4)          |
|                         |                                    | <b>p&lt;0.001</b>     | <b>p&lt;0.001</b>       | <b>p&lt;0.001</b>        |
| AHF type                | New onset<br>AHF (n=27)            | 139.4 (94.3-182.6)    | 32.5 (12.3-42.7)        | 24.3 (16.3-37.9)         |
|                         | AHF<br>following<br>CHF<br>(n=287) | 122.4 (48.0-240.4)    | 22.2 (4.5-56.3)         | 16.1 (6.1-40.4)          |
|                         |                                    | <b>p&lt;0.001</b>     | <b>p&lt;0.001</b>       | <b>p&lt;0.001</b>        |

Data are presented as median and minimum to maximum. Differences between the groups were tested with the Mann-Whitney U test.

P-values < 0.017 are considered significant after a Bonferroni correction for multiple testing and are depicted in bold.

AF, atrial fibrillation; AHF, acute heart failure; apoA-I, apolipoprotein A-I; CAD, coronary artery disease; CHF, chronic heart failure; HDL, high-density lipoprotein; HDL-p, HDL particle concentration; MetS, metabolic syndrome; S, small.

\*Any of the following: enlarged liver, peripheral edema, ascites or jugular venous distension.
