# Supplementary material for: HDL-apoA-II Is Strongly Associated with 1-Year Mortality in Acute Heart Failure Patients
Source: MDPI journal article supplement (doi:10.3390/biomedicines10071668), 2022-07-11
Supplement: s1 [file s1]

**Table S2.** Laboratory data of AHF patients upon hospital admission

|                                   | Alive<br>(N=197)   | Deceased<br>(N=118) | All<br>(N=315)     | p-<br>value |
|-----------------------------------|--------------------|---------------------|--------------------|-------------|
| Glucose (mmol/L)                  | 7.7 (3.0-34.8)     | 8.1 (3.6-33.9)      | 7.9 (3.0-34.8)     | 0.475       |
| Total proteins (g/L)              | 67.0 (41.0-87.0)   | 65.5 (43.0-81.0)    | 67.0 (41.0-87.0)   | 0.227       |
| Bilirubin (μmol/L)                | 17.4 (3.9-84.2)    | 17.2 (4.3-114.8)    | 17.3 (3.9-114.8)   | 0.056       |
| Leukocytes (x 10 <sup>9</sup> /L) | 9.5 (3.2-42.5)     | 10.4 (3.7-23.0)     | 9.9 (3.2-42.5)     | 0.785       |
| Platelets (x 10 <sup>9</sup> /L)  | 224.0 (39.0-556.0) | 222.5 (48.0-798.0)  | 224.0 (39.0-798.0) | 0.454       |
| Fibrinogen (g/L)                  | 4.0 (1.8-9.8)      | 4.0 (1.0-8.3)       | 4.0 (1.0-9.8)      | 0.244       |
| pH                                | 7.4 (7.0-7.5)      | 7.4 (6.8-7.5)       | 7.4 (6.8-7.5)      | 0.653       |
| pO <sub>2</sub> (kPa)             | 8.8 (4.1-19.5)     | 8.8 (4.6-23.8)      | 8.8 (4.1-23.8)     | 0.658       |
| sO <sub>2</sub> (%)               | 93.0 (47.0-99.4)   | 92.3 (60.0-99.0)    | 93.0 (47.0-99.4)   | 0.777       |
| pCO <sub>2</sub> (kPa)            | 5.2 (2.9-14.0)     | 5.2 (2.6-21.9)      | 5.2 (2.6-21.9)     | 0.185       |
| HCO <sub>3</sub> (mmol/L)         | 23.9 (9.8-42.2)    | 24.4 (11.3-47.9)    | 23.9 (9.8-47.9)    | 0.259       |

Data are presented as median and range (minimum to maximum). Differences between AHF patients who were alive and those who died within 1 year after study inclusion were tested with the Mann-Whitney U test.

P-values < 0.05 are considered significant.

pO<sub>2</sub>, partial oxygen pressure; sO<sub>2</sub>, oxygen saturation; pCO<sub>2</sub>, partial carbon dioxide pressure.
