# Supplementary material for: HDL-apoA-II Is Strongly Associated with 1-Year Mortality in Acute Heart Failure Patients
Source: MDPI journal article supplement (doi:10.3390/biomedicines10071668), 2022-07-11
Supplement: s1 [file s1]

**Table S3.** Serum levels of HDL parameters quantified by NMR spectroscopy

| HDL parameters<br>(mg/dL) | Alive<br>(N=197)   | Deceased<br>(N=118) | All<br>(N=315)     | p-<br>value       |
|---------------------------|--------------------|---------------------|--------------------|-------------------|
| HDL-apoA-II               | 26.4 (13.7-49.2)   | 22.3 (7.8-40.8)     | 24.3 (7.8-49.2)    | <b>&lt; 0.001</b> |
| HDL1-apoA-II              | 2.7 (0.6-10.3)     | 3.1 (0.3-10.3)      | 2.8 (0.3-10.3)     | 0.256             |
| HDL2-apoA-II              | 3.2 (1.3-7.7)      | 2.9 (1.3-6.3)       | 3.2 (1.3-7.7)      | <b>0.002</b>      |
| HDL3-apoA-II              | 5.3 (2.1-13.6)     | 4.1 (1.2-8.8)       | 4.9 (1.2-13.6)     | <b>&lt; 0.001</b> |
| HDL4-apoA-II              | 12.1 (1.2-27.3)    | 8.5 (0.0-23.6)      | 10.7 (0.0-27.3)    | <b>&lt; 0.001</b> |
| HDL-apoA-I                | 128.2 (52.4-240.4) | 117.2 (48.0-213.1)  | 123.7 (48.0-240.4) | <b>&lt; 0.001</b> |
| HDL1-apoA-I               | 30.3 (0.5-108.7)   | 34.6 (2.8-101.6)    | 31.2 (0.5-108.7)   | 0.055             |
| HDL2-apoA-I               | 17.2 (8.2-35.2)    | 16.2 (7.7-35.0)     | 17.1 (7.7-35.2)    | <b>0.036</b>      |
| HDL3-apoA-I               | 22.9 (9.9-46.1)    | 19.8 (2.9-35.9)     | 21.9 (2.9-46.1)    | <b>&lt; 0.001</b> |
| HDL4-apoA-I               | 53.2 (16.1-94.4)   | 43.8 (0.0-87.2)     | 48.3 (0.0-94.4)    | <b>&lt; 0.001</b> |
| HDL-p (μmol/L)            | 25.5 (7.2-56.3)    | 20.3 (4.5-41.6)     | 23.2 (4.5-56.3)    | <b>&lt; 0.001</b> |
| LHDL-p (μmol/L)           | 6.1 (2.8-20.5)     | 6.3 (2.8-17.8)      | 6.2 (2.8-20.5)     | 0.553             |
| SHDL-p (μmol/L)           | 19.0 (6.1-40.4)    | 13.1 (6.4-35.8)     | 16.9 (6.1-40.4)    | <b>&lt; 0.001</b> |
| HDL-C/HDL-apoA-I          | 0.39 (0.18-0.49)   | 0.41 (0.25-0.49)    | 0.40 (0.18-0.49)   | 0.042             |
| HDL-C/HDL-apoA-II         | 1.89 (0.52-3.46)   | 2.12 (0.96-4.14)    | 1.97 (0.52-4.14)   | <b>&lt; 0.001</b> |
| HDL-apoA-II/HDL-apoA-I    | 0.20 (0.13-0.36)   | 0.19 (0.10-0.30)    | 0.20 (0.10-0.36)   | <b>&lt; 0.001</b> |

Data are presented as median and minimum to maximum. Differences between AHF patients who were alive and those who deceased within 1 year after hospitalization for AHF were tested with the Mann-Whitney U test.

P-values of < 0.05 are considered significant and are depicted in bold.

apoA-I, apolipoprotein A-I; apoA-II, apolipoprotein A-II; C, cholesterol; HDL-p, high-density lipoprotein particle concentration; L, large; p, particle; S, small.
