# Supplementary material for: HDL-apoA-II Is Strongly Associated with 1-Year Mortality in Acute Heart Failure Patients
Source: MDPI journal article supplement (doi:10.3390/biomedicines10071668), 2022-07-11
Supplement: s1 [file s1]

**Table S6.** Multivariable Cox regression analyses of HDL parameters as predictors of 1-year mortality in AHF patients

| Variable                        | Adjusted * |                         |                  |          |
|---------------------------------|------------|-------------------------|------------------|----------|
|                                 | SD         | HR (95% CI)<br>per 1 SD | p-Value          | Events/N |
| HDL-p<br>( $\mu\text{mol/L}$ )  | 8.3        | 0.65 (0.51-0.84)        | <b>0.001</b>     | 117/312  |
| SHDL-p<br>( $\mu\text{mol/L}$ ) | 7.4        | 0.69 (0.51-0.93)        | <b>0.015</b>     | 101/289  |
| HDL-apoA-I<br>(mg/dL)           | 29.4       | 0.79 (0.63-0.98)        | <b>0.035</b>     | 116/312  |
| HDL1-apoA-I<br>(mg/dL)          | 16.4       | 1.07 (0.89-1.28)        | 0.501            | 116/312  |
| HDL2-apoA-I<br>(mg/dL)          | 4.6        | 0.86 (0.70-1.06)        | 0.165            | 116/312  |
| HDL3-apoA-I<br>(mg/dL)          | 6.1        | 0.68 (0.54-0.87)        | <b>0.002</b>     | 116/312  |
| HDL4-apoA-I<br>(mg/dL)          | 16.5       | 0.62 (0.48-0.81)        | <b>&lt;0.001</b> | 116/312  |

Significant associations are depicted in bold.

\* Adjusted for age, sex, MAP, eGFR, BUN, LDL-cholesterol, and NT-proBNP.

apoA-I, apolipoprotein A-I; BUN, blood urea nitrogen; eGFR, estimated glomerular filtration rate; HDL-p, high-density lipoprotein particle concentration; HR, hazard ratio; LDL, low-density lipoprotein; MAP, mean arterial pressure; NT-proBNP, N-terminal pro brain natriuretic peptide; S, small; SD, standard deviation.
